# Supplementary material for: Effect of waste cellulose fibres on the charge storage capacity of polypyrrole and graphene/polypyrrole electrodes for supercapacitor application
Source: Royal Society of Chemistry journal article supplement (doi:10.1039/c4ra16174b), 2015-01-01
Supplement: c4ra16174b1.pdf [file c4ra16174b1.pdf]

## Supporting Information

Effect of Waste Cellulose Fibre on Charge Storage Capacity of Polypyrrole and Graphene/polypyrrole Electrodes for Supercapacitor Application

A.De.Adhikaria, R.Oraona, S.K.Tiwaria, Joong Hee Leeb,cand G.C.Nayaka\*

a Department of Applied Chemistry, ISM Dhanbad, Dhanbad 826 004, Jharkhand, India

b WCU Program, Department of BIN Fusiigon Technology, Chonbuk National University, Jeonju, Jeonbuk 561-756, Republic of Korea

c Department of Hydrogen and Fuel Cell Engineering, Chonbuk National University, Jeonju, Jeonbuk 561-756, Republic of Korea

### BET surface Area:

The BET surface area and pore size analysis of the samples was measured at liquid nitrogen temperature with a Quantachrome Nova 3200e at 77 K. Pre-treatment of the samples was done at 373 K for 3 h under high vacuum. The surface area was determined by the Brunauer–Emmett–Teller (BET) equation. The average pore size of the NFC aerogels was estimated from the nitrogen desorption isotherm according to the analysis of Barrett–Joyner–Halendar (BJH)

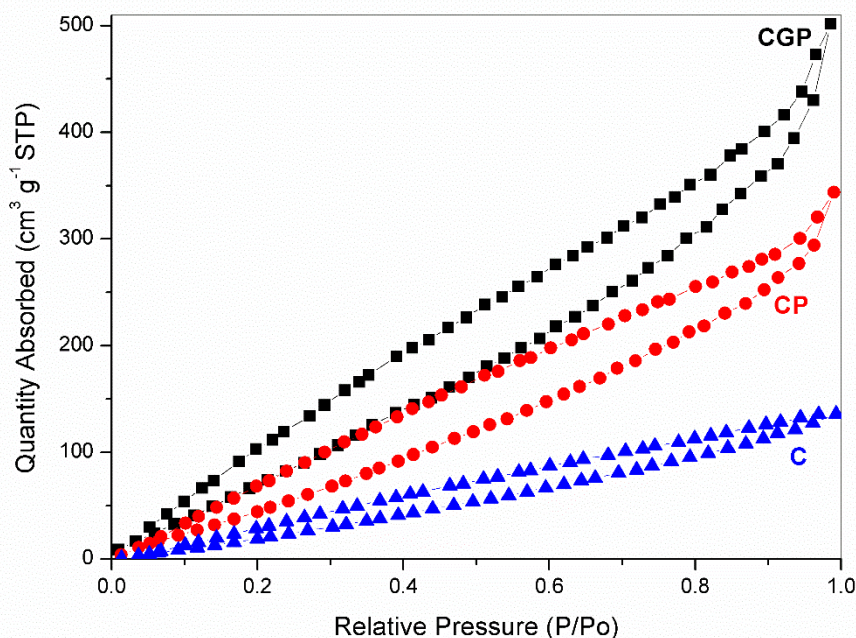

Figure : 1

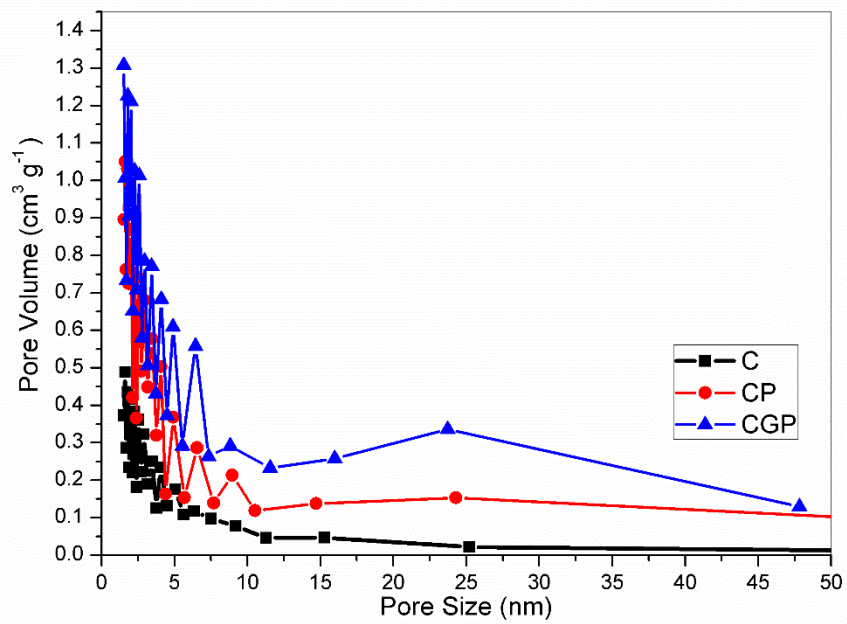

Figure 2
